# Supplementary material for: The highly dynamic nature of bacterial heteroresistance impairs its clinical detection
Source: PubMed Central journal article supplement (PMC8099907; doi:10.1038/s42003-021-02052-x), 2021-05-05
Supplement: 42003_2021_2052_MOESM1_ESM.pdf [file 42003_2021_2052_MOESM1_ESM.pdf]

## SUPPLEMENTARY INFORMATION

### The highly dynamic nature of bacterial heteroresistance impairs its clinical detection

Cátia Pereira<sup>1</sup>, Jimmy Larsson<sup>2</sup>, Karin Hjort<sup>1</sup>, Johan Elf<sup>2</sup> and Dan I. Andersson<sup>1\*</sup>

<sup>1</sup>Department of Medical Biochemistry and Microbiology, Uppsala University, Sweden

<sup>2</sup>Department of Cell and Molecular Biology, Uppsala University, Sweden

**Supplementary Table 1. MIC increase and Clinical Breakpoints for the populations evolved in the presence of sub-MIC antibiotic concentrations and respective MIC of the wild-type parental strain.** Determinations of MICs were based on 3 biological and 1 technical replicates.

| Antibiotic              | Clinical Breakpoint (mg/L) <sup>2</sup> | MIC of the wild-type susceptible strain (mg/L) | Clinical Breakpoint (xMIC <sub>WT</sub> ) <sup>2</sup> | MIC Increase (xMIC <sub>WT</sub> ) in the population evolved at 1xMIC <sub>WT</sub> |
|-------------------------|-----------------------------------------|------------------------------------------------|--------------------------------------------------------|-------------------------------------------------------------------------------------|
| Tobramycin              | 4                                       | 3.0                                            | 1.3                                                    | 3 – 8                                                                               |
| Tetracycline            | 16                                      | 12.0                                           | 2.0                                                    | 4                                                                                   |
| Cefepime                | 4                                       | 0.19                                           | 21                                                     | 340 – 2723                                                                          |
| Piperacillin-Tazobactam | 16                                      | 8.0                                            | 1.3                                                    | 5.3                                                                                 |

**Supplementary Table 2. Statistical analysis of relative exponential growth rates differences between isolates with different copy number.** Mean value of relative exponential growth rate per copy number and respective *p*-value obtained from the *T*-test performed to calculate the significance of relative exponential growth rate differences between copy numbers.

| Antibiotic Concentration (xMIC <sub>WT</sub> ) | <i>E. coli</i> DA33135                |           |                 | <i>S. Typhimurium</i> DA34827         |           |                 |
|------------------------------------------------|---------------------------------------|-----------|-----------------|---------------------------------------|-----------|-----------------|
|                                                | Mean Relative Exponential Growth Rate |           | <i>p</i> -value | Mean Relative Exponential Growth Rate |           | <i>p</i> -value |
|                                                | CN = 2.3                              | CN = 5.1  |                 | CN = 3.5                              | CN = 9.4  |                 |
| 1/64                                           | 0.8903333                             | 0.8755000 | 0.03138         | 0.9953166                             | 0.9664259 | 0.00747         |
| 1/16                                           | 0.9198667                             | 0.8879333 | 0.00349         | 0.9982810                             | 0.9817932 | 0.07571         |
| 1/8                                            | 0.9403667                             | 0.9017667 | 0.09967         | 1.0134308                             | 0.9916848 | 0.06182         |
| 1/4                                            | 0.9428000                             | 0.9007667 | 0.00497         | 1.017661                              | 1.009225  | 0.2241          |
| 1/2                                            | 0.9030                                | 0.8778    | 0.06459         | 0.9811492                             | 0.9863017 | 0.641           |
| 1                                              | 0.7585667                             | 0.8705667 | 0.00536         | 0.9036811                             | 0.9563884 | 0.01884         |
| 2                                              | 0.7305667                             | 0.8078667 | 0.07548         | 0.6775856                             | 0.9033340 | 0.01413         |
| 4                                              | 0.6250667                             | 0.6167667 | 0.6729          | -                                     | -         | -               |

**Supplementary Table 3. Recombination rate, cost of duplication and calculated cost (%) per kbp of DNA estimated by the model simulation and fitness cost (%) per kbp of DNA.**

|                         | Strain  | Size of the amplified unit (kbp) | Estimated parameters             |                         |                                 | Fitness cost (%) /kbp of DNA (Batch Culture) |
|-------------------------|---------|----------------------------------|----------------------------------|-------------------------|---------------------------------|----------------------------------------------|
|                         |         |                                  | Recombination rate ( $k_{rec}$ ) | Cost of duplication (s) | Calculated cost (%) /kbp of DNA |                                              |
| Tobramycin              | DA69068 | 27.7                             | 0.0029                           | -0.012                  | 0.043                           | 0.0237                                       |
|                         | DA69069 | 27.7                             | 0.0030                           | -0.017                  | 0.061                           | 0.0395                                       |
| Tetracycline            | DA69071 | 9.7                              | 0.0032                           | -0.003                  | 0.031                           | 0.1135                                       |
|                         | DA69073 | 9.7                              | 0.0032                           | -0.004                  | 0.041                           | 0.0463                                       |
| Cefepime                | DA69074 | 10.4                             | 0.0029                           | -0.001                  | 0.010                           | 0.0232                                       |
|                         | DA69075 | 10.4                             | 0.0037                           | -0.004                  | 0.038                           | 0.0414                                       |
|                         | DA69076 | 10.4                             | 0.0034                           | -0.004                  | 0.038                           | 0.0583                                       |
| Piperacillin-Tazobactam | DA69077 | 3.5                              | 0.0025                           | -0.002                  | 0.057                           | 0.1154                                       |
|                         | DA69078 | 3.5                              | 0.0029                           | -0.005                  | 0.143                           | 0.0539                                       |
|                         | DA69079 | 3.5                              | 0.0020                           | -0.001                  | 0.029                           | 0.0501                                       |

**Supplementary Table 4. List of strains used in this study.**

| DA number | Species                             | Genotype                                                              | Reference/source                                                                 | Comment                                                                       |
|-----------|-------------------------------------|-----------------------------------------------------------------------|----------------------------------------------------------------------------------|-------------------------------------------------------------------------------|
| DA33135   | <i>E. coli</i>                      | Chromosome: 4.96 Mbp, plasmids 139kbp pDA33135-139, 70kbp pDA33135-70 | 1                                                                                | Clinical isolate ECO-005                                                      |
| DA34827   | <i>S. enterica</i> Var. Typhimurium | Chromosome: 4.93 Mbp                                                  | The public health agency of Sweden, received from Cecilia Järnberg (unpublished) | Clinical Isolate from feces, Sweden                                           |
| DA34833   | <i>S. enterica</i> Var. Typhimurium | Chromosome: 4.93 Mbp, plasmid 94 kbp pDA34833-94                      | The public health agency of Sweden, received from Cecilia Järnberg (unpublished) | Clinical Isolate from feces, Sweden                                           |
| DA61218   | <i>E. coli</i>                      | Chromosome: 5.1 Mbp, plasmid 116 kbp pDA61218-116                     | Received from Uppsala University Hospital (unpublished)                          | Clinical isolate, Sweden                                                      |
| DA63680   | <i>E. coli</i>                      | -                                                                     | Received from Eva Tano (unpublished)                                             | Clinical isolate collected from patients with sepsis during 2014-2015, Sweden |
| DA63702   | <i>E. coli</i>                      | -                                                                     | Received from Eva Tano (unpublished)                                             | Clinical isolate collected from patients with sepsis during 2014-2015, Sweden |
| DA63818   | <i>E. coli</i>                      | -                                                                     | Received from Eva Tano (unpublished)                                             | Clinical isolate collected from patients with sepsis during 2014-2015, Sweden |
| DA63834   | <i>E. coli</i>                      | -                                                                     | Received from Eva Tano (unpublished)                                             | Clinical isolate collected from patients with sepsis during 2014-2015, Sweden |
| DA63836   | <i>E. coli</i>                      | -                                                                     | Received from Eva Tano (unpublished)                                             | Clinical isolate collected from patients with sepsis during 2014-2015, Sweden |
| DA63870   | <i>E. coli</i>                      | -                                                                     | Received from Eva Tano (unpublished)                                             | Clinical isolate collected from patients with sepsis during 2014-2015, Sweden |

|         |                                           |                                                                                      |                                      |                                                                               |
|---------|-------------------------------------------|--------------------------------------------------------------------------------------|--------------------------------------|-------------------------------------------------------------------------------|
| DA63874 | <i>E. coli</i>                            | -                                                                                    | Received from Eva Tano (unpublished) | Clinical isolate collected from patients with sepsis during 2014-2015, Sweden |
| DA63882 | <i>E. coli</i>                            | -                                                                                    | Received from Eva Tano (unpublished) | Clinical isolate collected from patients with sepsis during 2014-2015, Sweden |
| DA63918 | <i>E. coli</i>                            | -                                                                                    | Received from Eva Tano (unpublished) | Clinical isolate collected from patients with sepsis during 2014-2015, Sweden |
| DA69068 | <i>E. coli</i>                            | Chromosome: 4.96 Mbp, plasmids 139kbp pDA69068-139: ampl 27.7 kbp, 70kbp pDA33135-70 | This study                           | DA33135 selected at 3.0mg/L tobramycin                                        |
| DA69069 | <i>E. coli</i>                            | Chromosome: 4.96 Mbp, plasmids 139kbp pDA69069-139: ampl 27.7 kbp, 70kbp pDA33135-70 | This study                           | DA33135 selected at 3.0mg/L tobramycin                                        |
| DA69070 | <i>E. coli</i>                            | Chromosome: 4.96 Mbp, plasmids 139kbp pDA69070-139: ampl 27.7 kbp, 70kbp pDA33135-70 | This study                           | DA33135 selected at 3.0mg/L tobramycin                                        |
| DA69071 | <i>S. enterica</i><br>Var.<br>Typhimurium | Chromosome: 4.93 Mbp ampl 9.7 kbp                                                    | This study                           | DA34827 selected at 12.0mg/L tetracycline                                     |
| DA69072 | <i>S. enterica</i><br>Var.<br>Typhimurium | Chromosome: 4.93 Mbp ampl 9.7 kbp                                                    | This study                           | DA34827 selected at 12.0mg/L tetracycline                                     |
| DA69073 | <i>S. enterica</i><br>Var.<br>Typhimurium | Chromosome: 4.93 Mbp ampl 9.7 kbp                                                    | This study                           | DA34827 selected at 12.0mg/L tetracycline                                     |
| DA69074 | <i>S. enterica</i><br>Var.<br>Typhimurium | Chromosome: 4.93 Mbp ampl 10.4 kbp, plasmid 94 kbp pDA69074-94                       | This study                           | DA34833 selected at 0.094mg/L cefepime                                        |
| DA69075 | <i>S. enterica</i><br>Var.<br>Typhimurium | Chromosome: 4.93 Mbp ampl 10.4 kbp, plasmid 94 kbp pDA69074-94                       | This study                           | DA34833 selected at 0.094mg/L cefepime                                        |
| DA69076 | <i>S. enterica</i><br>Var.<br>Typhimurium | Chromosome: 4.93 Mbp ampl 10.4 kbp, plasmid 94 kbp pDA69074-94                       | This study                           | DA34833 selected at 0.094mg/L cefepime                                        |
| DA69077 | <i>E. coli</i>                            | Chromosome: 5.1 Mbp, plasmid 116 kbp: pDA69077-116 ampl 3.5 kbp                      | This study                           | DA61218 selected at 64mg/L piperacillin-tazobactam                            |
| DA69078 | <i>E. coli</i>                            | Chromosome: 5.1 Mbp, plasmid 116 kbp: pDA69077-116 ampl 3.5 kbp                      | This study                           | DA61218 selected at 64mg/L piperacillin-tazobactam                            |
| DA69079 | <i>E. coli</i>                            | Chromosome: 5.1 Mbp, plasmid 116 kbp: pDA69077-116 ampl 3.5 kbp                      | This study                           | DA61218 selected at 64mg/L piperacillin-tazobactam                            |

**Supplementary Table 5. List of primers used for the digital droplet PCR.**

| Primer        | Sequence (5'-3')       | Description                                                                                 |
|---------------|------------------------|---------------------------------------------------------------------------------------------|
| aac(3) – F    | AATCCGATGCCGTTTTCCAG   | Oligo binding to the putative resistance gene <i>aac(3)-IId</i> in the plasmid pDA33135-139 |
| aac(3) – R    | AAACTCCGTTACCGCATTGC   | Oligo binding to the putative resistance gene <i>aac(3)-IId</i> in the plasmid pDA33135-139 |
| plasmid6 – F  | CTCCCTGAGAAGAATGGCCA   | Oligo binding to the plasmid pDA33135-139 (used to determine plasmid copy number)           |
| plasmid6 – R  | GCATATGGTGACGCTGATCC   | Oligo binding to the plasmid pDA33135-139 (used to determine plasmid copy number)           |
| lpp – F       | CTACTCTGCTGGCAGGTTGC   | Oligo binding to the chromosome DA33135                                                     |
| lpp – R       | CACGAGCTGCGTCATCTTTAG  | Oligo binding to the chromosome DA33135                                                     |
| tet(A)2 – F   | GCGGTCGGTATTGTCTTCAC   | Oligo binding to the putative resistance gene <i>tet(A)</i> in the chromosome DA34827       |
| tet(A)2 – R   | GGATGCAGAAGTAGAACGCG   | Oligo binding to the putative resistance gene <i>tet(A)</i> in the chromosome DA34827       |
| glpK – F      | TGCATCAGGAAGTTGTTGGC   | Oligo binding to the chromosome DA34827                                                     |
| glpK – R      | AATCACATTATCCGCGCGAC   | Oligo binding to the chromosome DA34827                                                     |
| blaCARB – F   | AAGTAGGGCAGGCAATCACA   | Oligo binding to the putative resistance gene <i>blaCARB</i> in the chromosome DA34833      |
| blaCARB – R   | GACGAGTCTCTTTGTCCCA    | Oligo binding to the putative resistance gene <i>blaCARB</i> in the chromosome DA34833      |
| kdpB – F      | ATCACAATGCTGCGACCTTC   | Oligo binding to the chromosome DA34833                                                     |
| kdpB – R      | GCCAGGCGTCCGATTTTATT   | Oligo binding to the chromosome DA34833                                                     |
| blaSHV(1) – F | CTATCCGGCAATCGTTGAG    | Oligo binding to the putative resistance gene <i>blaSHV</i> in the plasmid pDA61218-116     |
| blaSHV(1) – R | TTTTATTCCACGGGTCAGG    | Oligo binding to the putative resistance gene <i>blaSHV</i> in the plasmid pDA61218-116     |
| plasmid3 – F  | TTGCCGACTACCTTGGTGAT   | Oligo binding to the plasmid pDA61218-116 (used to determine plasmid copy number)           |
| plasmid3 – R  | CCCAGTATCAGCCCGTCATA   | Oligo binding to the plasmid pDA61218-116 (used to determine plasmid copy number)           |
| rplT – F      | GCGATATCAGCCAGGATCTTAC | Oligo binding to the chromosome DA61218                                                     |
| rplT – R      | GTCGTCAACGTAAGCGTCAG   | Oligo binding to the chromosome DA61218                                                     |

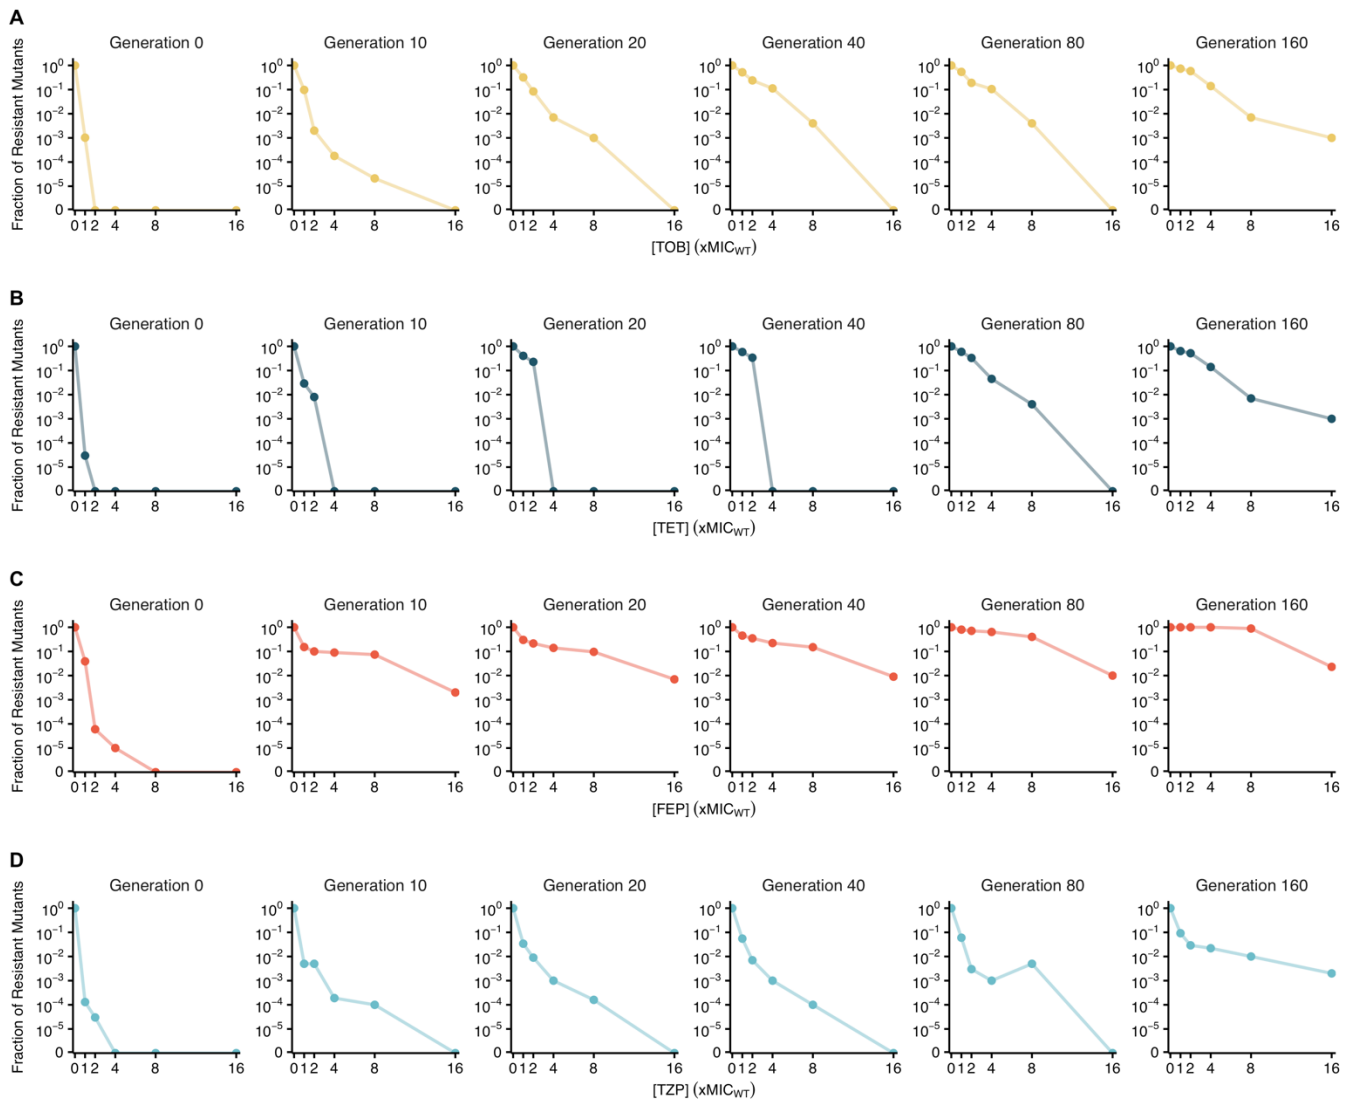

**Supplementary Figure 1. Population Analysis Profile of resistant sub-populations selected at  $1xMIC_{WT}$ .** Populations were evolved from (A) *E. coli* DA33135 in the presence of tobramycin, (B) *S. Typhimurium* DA34827 in the presence of tetracycline (C) *S. Typhimurium* DA34833 in the presence of cefepime and (D) *E. coli* DA61218 in the presence of piperacillin-tazobactam. One serially passaged lineage per antibiotic was plated on Mueller-Hinton agar containing increasing concentrations of antibiotic and the fraction of resistant mutants was determined.

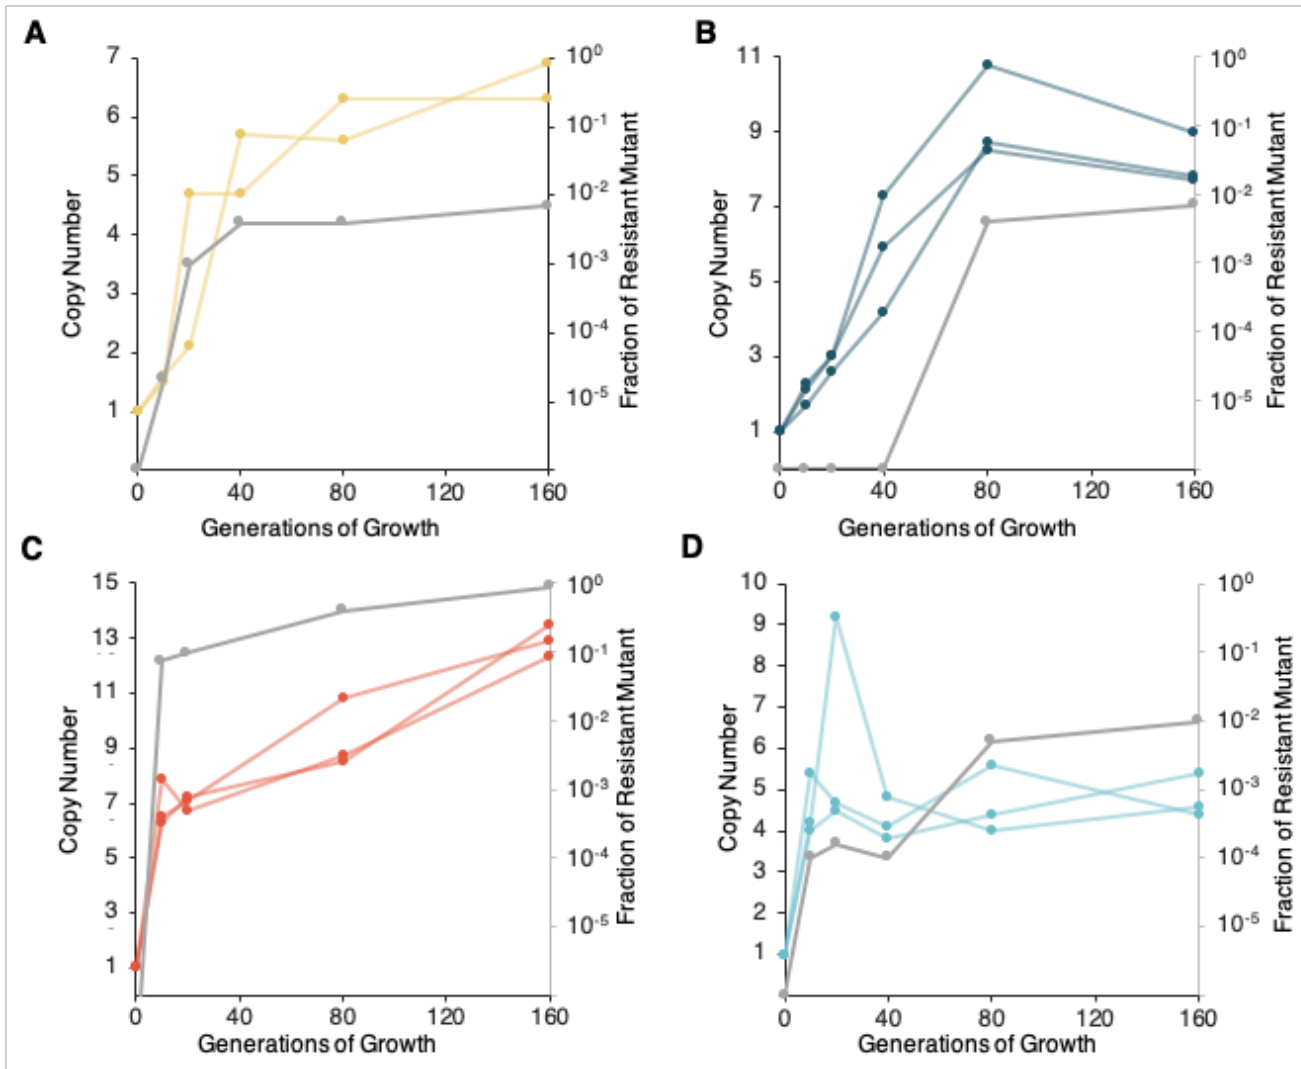

**Supplementary Figure 2. Copy number and selection at 1xMIC<sub>WT</sub>.** Subpopulations were evolved from (A) *E. coli* DA33135 resistant to 8xMIC<sub>WT</sub> of tobramycin, (B) *S. Typhimurium* DA34827 resistant to 8xMIC<sub>WT</sub> tetracycline (C) *S. Typhimurium* DA34833 resistant to 8xMIC<sub>WT</sub> cefepime and (D) *E. coli* DA61218 resistant to 8xMIC<sub>WT</sub> piperacillin-tazobactam. In grey, the fraction of resistant mutants resistant to the antibiotic tested for selection. In color, the gene copy number of the mutants selected at 1xMIC<sub>WT</sub> of the same antibiotics. Two independent clones were analysed for the evolution of *E. coli* DA33135 in the presence of tobramycin at 1xMIC<sub>WT</sub> of the susceptible strain; three independent clones were analysed for all other experiments.

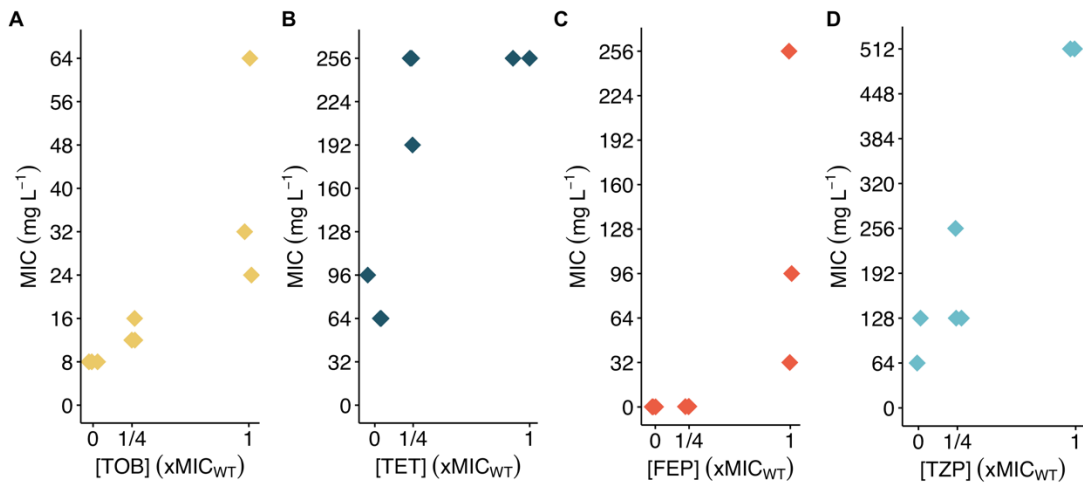

**Supplementary Figure 3. MIC of the populations as a function of selective antibiotic concentrations.** Tobramycin (A), tetracycline (B), cefepime (C) and piperacillin-tazobactam. The MIC was measured for three biological replicates of the wild-type strains (0x the MIC of the susceptible strain) and the populations were evolved at 1/4x and 1x the MIC of the susceptible strain for 80 generations. Determinations of MICs were based on 3 biological and 1 technical replicates.

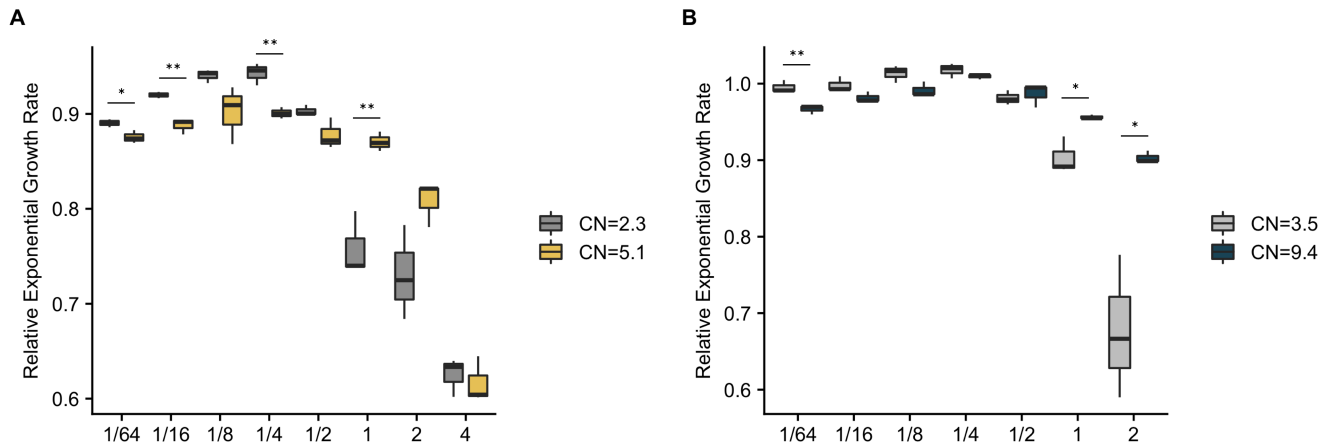

**Supplementary Figure 4. Mean relative exponential growth rate of isolates with different copy numbers at increasing antibiotic concentrations.** (A) tobramycin and (B) tetracycline. Growth measured for independent clones evolved from the heteroresistant parental strains (A) *E. coli* DA33135 and (B) *S. Typhimurium* DA34827. The growth rates are relative to the growth rate of the heteroresistant parental isolates in the absence of selection. *T*-tests were performed to calculate the significance of the differences in relative exponential growth rate observed between isolates with different copy number, where \* indicates a *p*-value < 0.05 and \*\* indicates a *p*-value < 0.01.

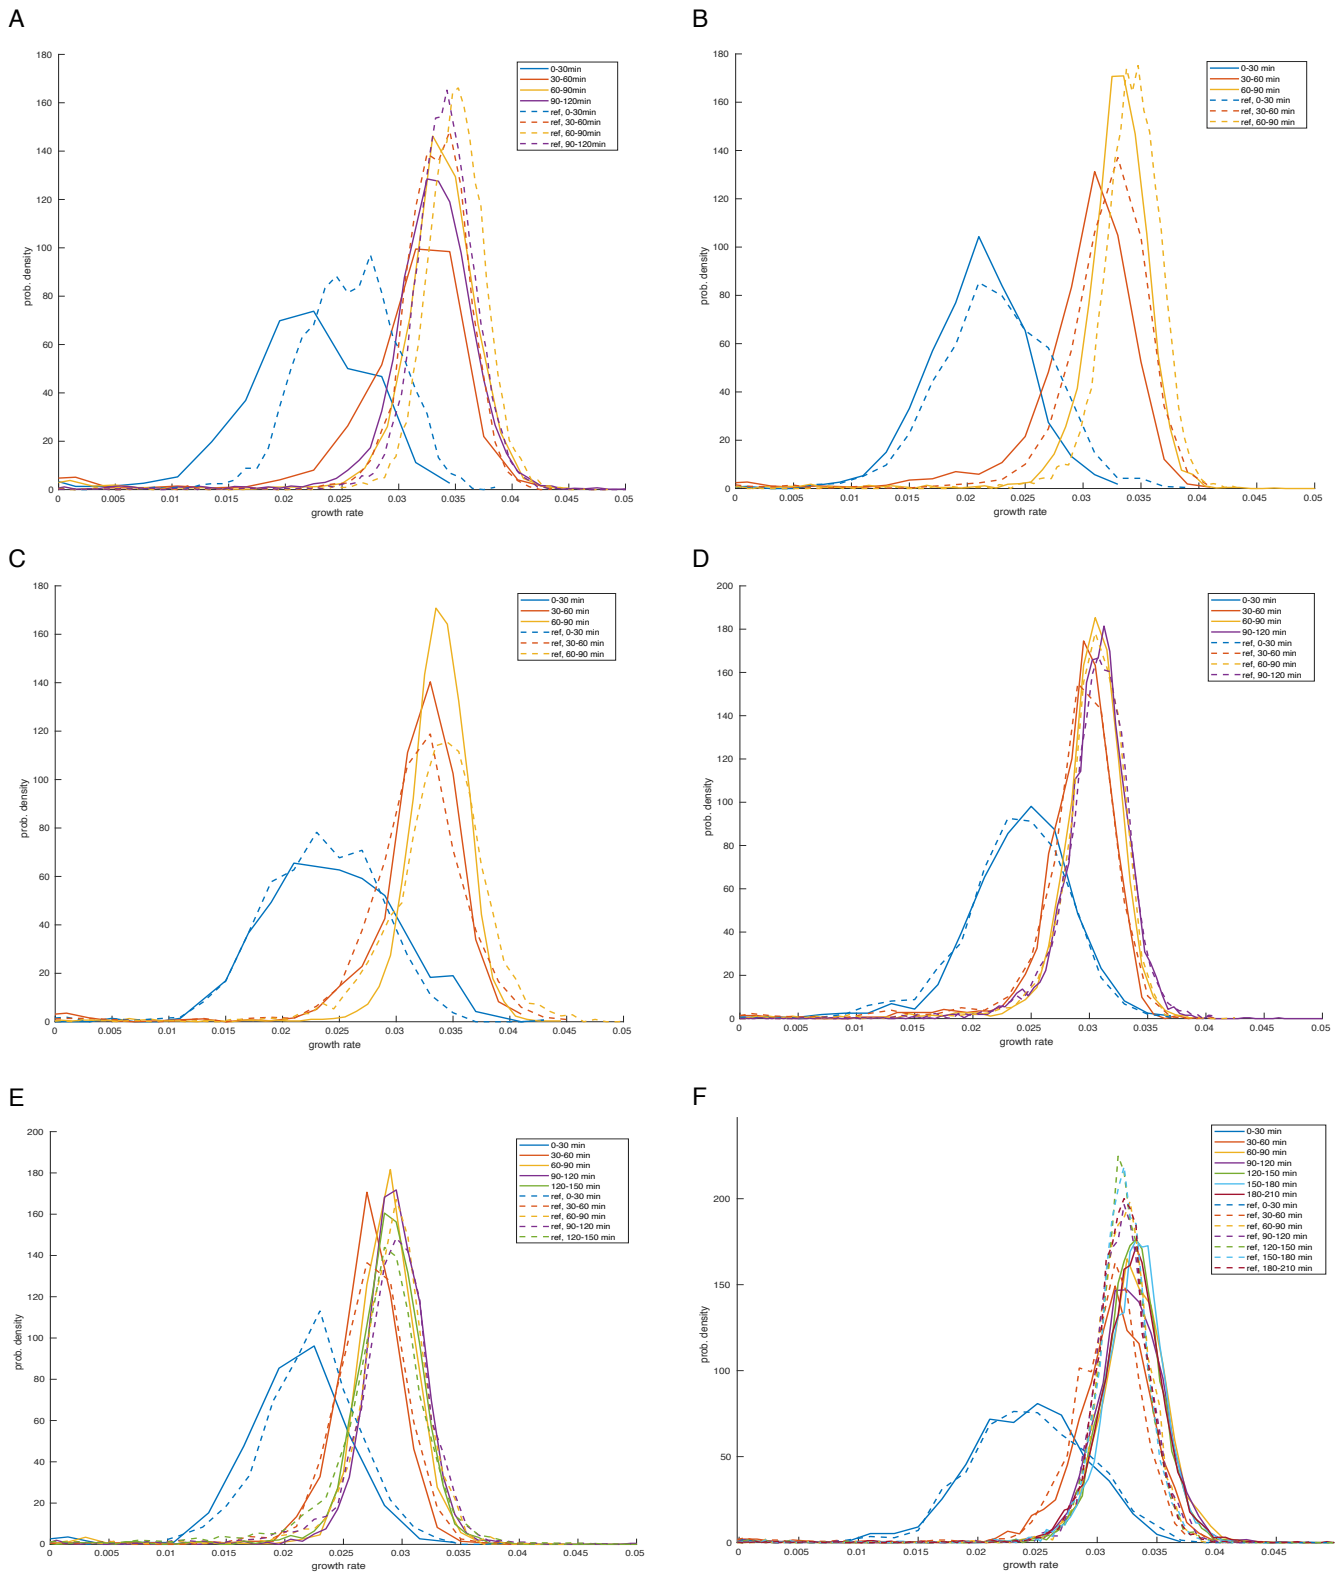

**Supplementary Figure 5. Single-cell growth rate measurements.** Solid lines show the distribution of growth rate for the sample cells measured at different 30-minute time intervals (each color represents a time interval) and dashed lines show the distribution of growth rate for the reference single-cell growth rates. Growth rates measured for samples DA69068 (A), DA69069 (B), DA69070 (C), DA69072 (D), DA69074 (E) and DA69078 (F).



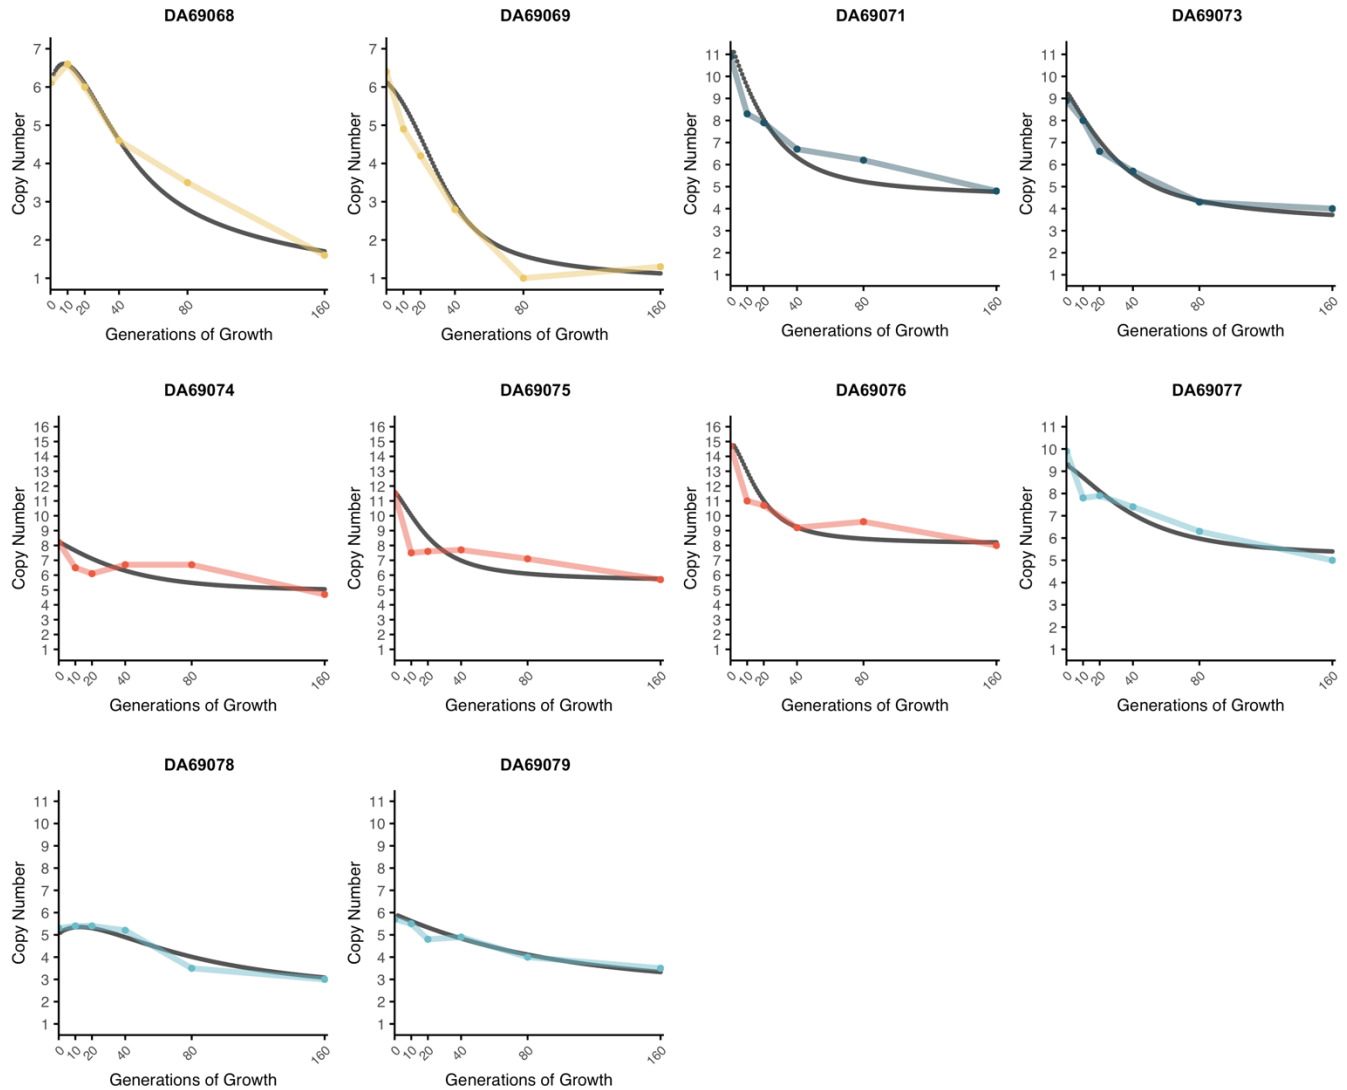

**Supplementary Figure 6. Determination of fitness cost and recombination rates of amplified units for loss of gene amplifications using the model for homologous recombination.** Colored lines show the copy number as a function of generations of growth for the experimental rate of loss of each mutant in which no additional mutations were found. Yellow, blue, orange and turquoise represent isolates evolved from the parental strain *E. coli* DA33135 evolved in the presence of tobramycin, *S. Typhimurium* DA34827 in the presence of tetracycline, *S. Typhimurium* DA34833 in the presence of cefepime and *E. coli* DA61218 in the presence of piperacillin-tazobactam, respectively. Gray lines represent the simulated results using the  $k_{rec}$  and  $s$  parameters that best fitted the model.

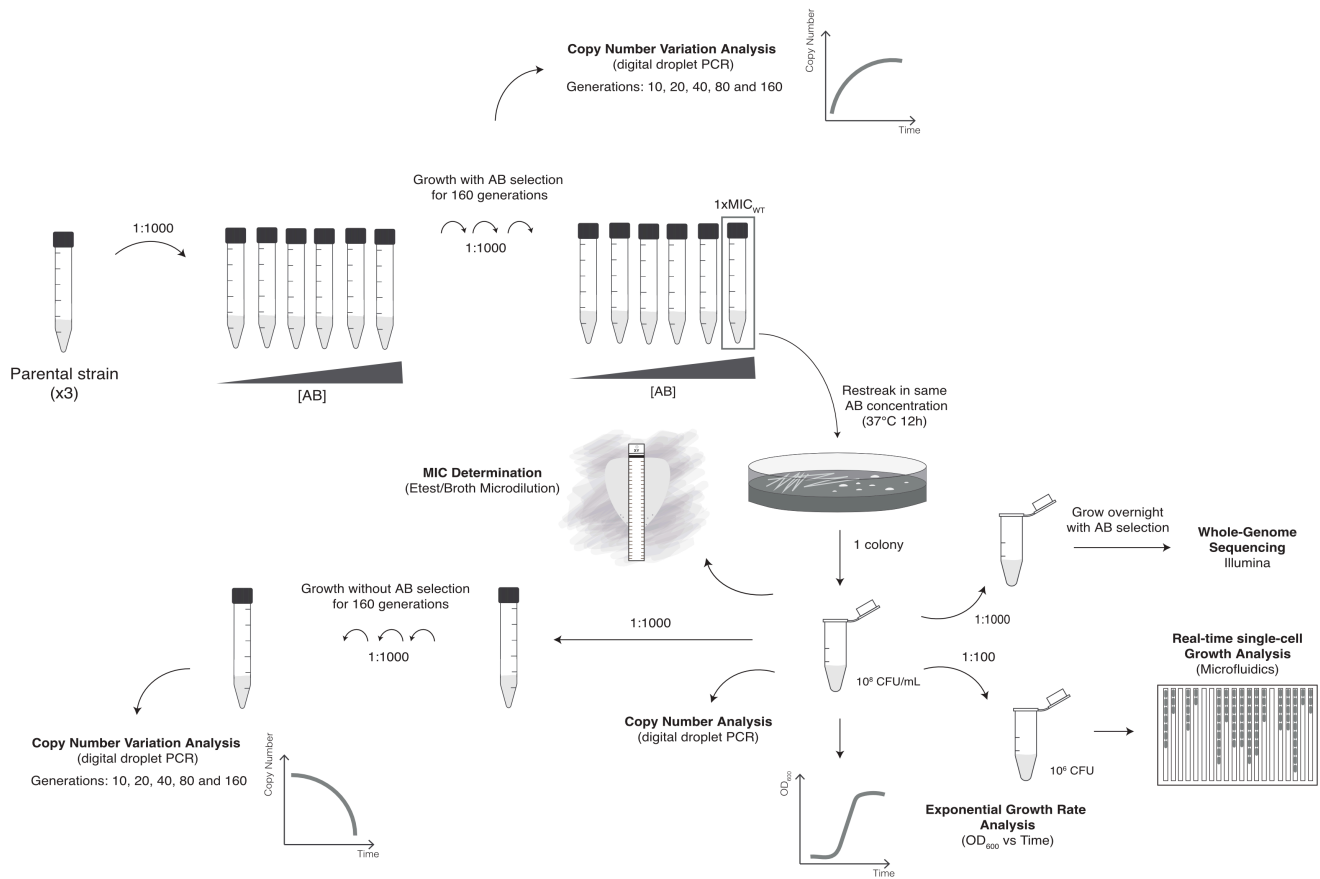

**Supplementary Figure 7. Schematic outline of the method used for the selection of resistant subpopulations in the presence of sub-lethal antibiotic concentrations, characterization of isolates with variable initial copy number and evolution in the absence of selection.**

## REFERENCES

1. Brolund, A., Franzén, O., Melefors, O., Tegmark-Wisell, K. & Sandegren, L. Plasmidome-analysis of ESBL-producing escherichia coli using conventional typing and high-throughput sequencing. *PLoS One* **8**, e65793–e65793 (2013).
2. *The European Committee on Antimicrobial Susceptibility Testing. Breakpoint tables for interpretation of MICs and zone diameters, version 10.0, 2020.* [http://www.eucast.org/clinical\\_breakpoints/](http://www.eucast.org/clinical_breakpoints/).
