# Supplementary material for: The highly dynamic nature of bacterial heteroresistance impairs its clinical detection
Source: PubMed Central journal article supplement (PMC8099907; doi:10.1038/s42003-021-02052-x), 2021-05-05
Supplement: 42003_2021_2052_MOESM5_ESM.pdf [file 42003_2021_2052_MOESM5_ESM.pdf]

## Description of Additional Supplementary Files

File Name: Supplementary Data 1

Description: Source Data
